## RESEARCH ARTICLE

# Hypoxia delays hematopoiesis: retention of embryonic hemoglobin and erythrocytes in larval rainbow trout, *Oncorhynchus mykiss*, during chronic hypoxia exposure

Kristin Bianchini\* and Patricia A. Wright

Department of Integrative Biology, University of Guelph, Guelph, ON, N1G 2W1, Canada

\*Author for correspondence (kbianchi@uoguelph.ca)

### SUMMARY

In rainbow trout development, a switch occurs from high-affinity embryonic hemoglobin (Hb) and round, embryonic erythrocytes to lower-affinity adult Hb and oval, adult erythrocytes. Our study investigated the early ontogeny of rainbow trout blood properties and the hypoxia response. We hypothesized that hypoxia exposure would delay the ontogenetic turnover of Hb and erythrocytes because retention of high-affinity embryonic Hb would facilitate oxygen loading. To test this hypothesis we developed a method of efficiently extracting blood from individual embryos and larvae and optimized several techniques for measuring hematological parameters on microliter (0.5–2.0  $\mu$ l) blood samples. In chronic hypoxia (30% of oxygen saturation), stage-matched embryos and larvae possessed half the Hb concentration, erythrocyte counts and hematocrit observed in normoxia. Hypoxia-reared larvae also had threefold to sixfold higher mRNA expression of the embryonic Hb  $\alpha$ -1,  $\beta$ -1 and  $\beta$ -2 subunits relative to stage-matched normoxia-reared larvae. Furthermore, in hypoxia, the round embryonic erythrocytic shape persisted into later developmental stages. Despite these differences, Hb–oxygen affinity ( $P_{50}$ ), cooperativity and the Root effect were unaltered in hypoxia-reared *O. mykiss*. The data support our hypothesis that chronic hypoxia delays the ontogenetic turnover of Hb and erythrocytes, but without the predicted functional consequences (i.e. higher than expected  $P_{50}$ ). These results also suggest that the Hb–oxygen affinity is protected during development in chronic hypoxia to favor oxygen unloading at the tissues. We conclude that in early trout development, the blood–oxygen transport system responds very differently to chronic hypoxia relative to adults, possibly because respiration depends relatively more on oxygen diffusion than convection.

Key words: embryo, erythrocytes, hemoglobin, hypoxia, larva, rainbow trout.

Received 26 November 2012; Accepted 27 August 2013

### INTRODUCTION

All vertebrate species undergo ontogenetic changes in Hb isoform expression (Wood, 1988). In the rainbow trout [*Oncorhynchus mykiss* (Walbaum 1792)], two distinct Hb polymorphs are present during ontogeny: embryonic Hb (Hb<sub>E</sub>) and adult Hb (Hb<sub>A</sub>) (Iuchi and Yamagami, 1969). Hb<sub>E</sub> is only found inside round, embryonic erythrocytes, which are produced in the intermediate cell mass and blood islands on the yolk sac (Iuchi and Yamamoto, 1983). Embryonic erythrocytes are the only erythrocyte in the circulation until 1 day before hatching, when a turnover of embryonic for oval, adult erythrocytes begins. By 1 day post-hatch (15°C), erythropoiesis is initiated in the kidney and spleen, which produce immature adult erythrocytes that ultimately grow into mature adult erythrocytes (Iuchi and Yamamoto, 1983). Post-hatching alevins thus possess a mixture of both Hb polymorphs and as development proceeds, the proportion of Hb<sub>E</sub> decreases and that of Hb<sub>A</sub> increases (Iuchi, 1973a; Iuchi and Yamamoto, 1983).

Previous research has shown that the blood–O<sub>2</sub> binding properties in early *O. mykiss* development differ from those in adults. At 25–28°C, Hb<sub>E</sub> exhibits a higher O<sub>2</sub> affinity (lower  $P_{50}$ ) and cooperativity (Hill coefficient,  $n_H$ ), a lower Bohr effect and no Root effect compared with Hb<sub>A</sub> (Iuchi, 1973b). However, the O<sub>2</sub>-binding properties of Hb<sub>E</sub> at lower temperatures, more representative of *O. mykiss*'s typical physiological temperatures, are unknown. Decreased temperature is known to lower the  $P_{50}$  and  $n_H$  and to raise the Bohr effect in Hb<sub>A</sub> (Irving et al., 1941; Cameron, 1971;

Eddy, 1971; Weber et al., 1976; Vorger, 1985; Willford and Hill, 1986). Whether a lower temperature would have a similar effect in Hb<sub>E</sub> has yet to be investigated. It is important to note that Hb<sub>E</sub> is an anodal Hb and is distinct from the cathodal Hb isoforms of adult trout, which also possess a high O<sub>2</sub> affinity and no Bohr effect (Iuchi and Yamagami, 1969; Iuchi, 1973a; Maruyama et al., 1999; Fago et al., 2001). Therefore, like the anodal Hbs in adult rainbow trout (Jensen et al., 1998), it is possible that Hb<sub>E</sub> is allosterically modified by organic phosphates.

Traditionally, it has been assumed that the initial ontogenetic appearance of convective Hb–O<sub>2</sub> transport is temporally synchronized with the onset of the heart beat and blood circulation. However, a growing body of work questions the role of Hb in O<sub>2</sub> uptake in early development. In larval rainbow trout and zebrafish (*Danio rerio*), functional ablation of Hb with carbon monoxide had little effect on heart rate, ventilation frequency or O<sub>2</sub> consumption (Holeton, 1971; Pelster and Burggren, 1996). In addition, *O. mykiss* larvae survive until the fry stage following phenylhydrazine-induced hemolysis (Iuchi, 1985). This raises the question: what is the physiological role of Hb prior to the need for convective O<sub>2</sub> transport?

Alternate roles for Hb<sub>E</sub> during embryonic and larval development have been proposed. Pelster and Burggren (Pelster and Burggren, 1996) suggested that Hb is required for the initial inflation of the swim bladder *via* the Root effect in fishes that do not gulp air; however, the absence of a Root effect in Hb<sub>E</sub> (Iuchi, 1973b; present

study) points to an alternative function in *O. mykiss*. Rombough and Drader (Rombough and Drader, 2009) found that when zebrafish larvae [7–14 days post fertilization (dpf)] gradually depleted the dissolved  $O_2$  in a closed respirometer, the residual  $O_2$  level (the amount of  $O_2$  remaining in the respirometer that the fish was unable to consume) was higher in larvae poisoned with carbon monoxide. They concluded that  $Hb_E$  assists with  $O_2$  uptake in larval zebrafish during extreme hypoxia. It is possible that in less hypoxia-tolerant species, such as *O. mykiss*,  $Hb_E$  contributes to  $O_2$  binding and transport during hypoxia, but this is unknown. Alternatively,  $Hb_E$  may also play a role in embryonic vasodilation *via* nitric oxide (NO). In adult vertebrates, NO is transported and may also be produced by  $Hb_A$  (Jensen, 2004). It is released from circulating erythrocytes in response to low tissue  $O_2$  levels and triggers vasodilation (Allen and Piantadosi, 2006). Similar to adults, NO induces vasodilation in zebrafish larvae (Fritsche et al., 2000); it is thus possible that similar to  $Hb_A$ ,  $Hb_E$  is also involved in NO transport and production (Pelster et al., 2010). Pelster et al. (Pelster et al., 2010) also suggest that because of its higher  $O_2$  affinity,  $Hb_E$  may play a role in  $O_2$  storage and buffering in early development.  $Hb_E$  and myoglobin have similar  $O_2$  affinities (Wittenberg and Wittenberg, 2007) and therefore, like myoglobin,  $Hb_E$  may only unload  $O_2$  during extreme hypoxia or help regulate intracellular  $O_2$  levels in order to maintain  $P_{O_2}$  gradients between the sarcoplasm and mitochondrion (Ordway and Garry, 2004). The high-affinity  $Hb_E$  may also help to scavenge reactive oxygen species (Pelster et al., 2010). This would be of particular importance in early embryonic development, as embryos are more sensitive to reactive oxygen species than adults (Massabuau, 2001; Hassoun et al., 2005). Another suggestion by Iuchi (Iuchi, 1985) is that  $Hb_E$  is a byproduct of embryonic erythropoietic stem cell production, which is required for the subsequent development of adult erythropoietic stem cells, but no follow up studies have been performed.

The first objective of this study was to investigate the early ontogeny of rainbow trout blood properties and the hypoxia response. Hypoxia has the potential to elicit plasticity in the timing of the onset of ontogenetic events, a phenomenon termed heterokairy (Spicer and Burggren, 2003). This has been observed previously in rainbow trout, where chronic hypoxia (30% of  $O_2$  saturation from the day of fertilization) delayed the onset of cardiac cholinergic control (Miller et al., 2011). We hypothesized that *O. mykiss* are also capable of plasticity in the ontogenetic onset of Hb turnover when  $O_2$  is limiting in the environment. Presumably, the properties that distinguish  $Hb_E$  from  $Hb_A$ , such as the higher  $O_2$  affinity relative to  $Hb_A$  (Iuchi, 1973b), could be exploited in hypoxia to help with  $O_2$  loading. Rombough and Drader (Rombough and Drader, 2009) postulated that Hb assists with  $O_2$  uptake in severe hypoxia in early

development. Therefore, we predicted a delay in the ontogenetic turnover of  $Hb_E$  for  $Hb_A$  in hypoxia. We thus anticipated higher concentrations of  $Hb_E$  during hypoxia exposure and, consequentially, an elevated Hb– $O_2$  affinity and cooperativity and lower Bohr and Root effects in hypoxia-reared relative to normoxia-reared larvae. The second objective of this study was to determine the  $O_2$ -binding properties of  $Hb_E$  at a lower, more physiologically representative temperature.

## MATERIALS AND METHODS

### Experimental animals

Rainbow trout embryos were obtained on the day of fertilization from Rainbow Springs Trout Farm (Thamesford, ON, Canada) and were transferred to the Hagen Aqualab (University of Guelph, Guelph, ON, Canada). Embryos were held on a mesh-bottom insert within custom-built 4 l treatment tanks, which were shielded from light and supplied with a continuous flow ( $\sim 20$  ml  $\text{min}^{-1}$ ) of local well water [ $10^\circ\text{C}$ ,  $10$  mg  $O_2$   $\text{l}^{-1}$ , pH 7.9, water hardness  $411$  mg  $\text{l}^{-1}$  as  $\text{CaCO}_3$ , ion concentrations ( $\text{mmol l}^{-1}$ ):  $2.6$   $\text{Ca}^{2+}$ ,  $1.5$   $\text{Cl}^-$ ,  $1.5$   $\text{Mg}^{2+}$ ,  $0.06$   $\text{K}^+$  and  $1.1$   $\text{Na}^+$ ]. Over a 14 month period, eight different batches of embryos were used. Each batch was derived from a separate spawning event between three females and three males. Embryos were staged according to Vernier (Vernier, 1969).

### Experimental protocol

#### Treatment conditions

From the day of fertilization, each batch of embryos was randomly divided into four tanks (4 l); half were supplied with normoxic water (100% of  $O_2$  saturation) and half were subjected to chronic hypoxia (30% of  $O_2$  saturation). This level of  $O_2$  saturation has been observed previously in salmonid redds (Coble, 1961; Peterson and Quinn, 1996; Youngson et al., 2004) and was shown to significantly affect metabolic rate and cardiac development in embryonic rainbow trout (Miller et al., 2008; Miller et al., 2011). Hypoxia was generated by introducing  $N_2$  gas into a header tank ( $\sim 16$  l). Dissolved  $O_2$  was monitored daily in the normoxic ( $98.7 \pm 0.4\%$ ) and hypoxic ( $29.7 \pm 0.5\%$ ) treatment tanks throughout the experiment (Hach LDO101 electrode connected to Hach HQ30d meter, Hach Company, Mississauga, ON, Canada).

Because hypoxia exposure delays salmonid development (Shumway et al., 1964; Hamor and Garside, 1976; Ciuhandu et al., 2005; Miller et al., 2008), embryo sampling was stage-matched for the two treatment groups. Embryos were sampled at Vernier Stages 27 (pre-hatch; circulatory system is formed and functioning), 30 (hatch), 32 and 33 (in preliminary experiments a large increase in  $P_{50}$  was observed between these stages), and 35 (near-complete yolk absorption; Fig. 1). These sampling points allowed for an assessment

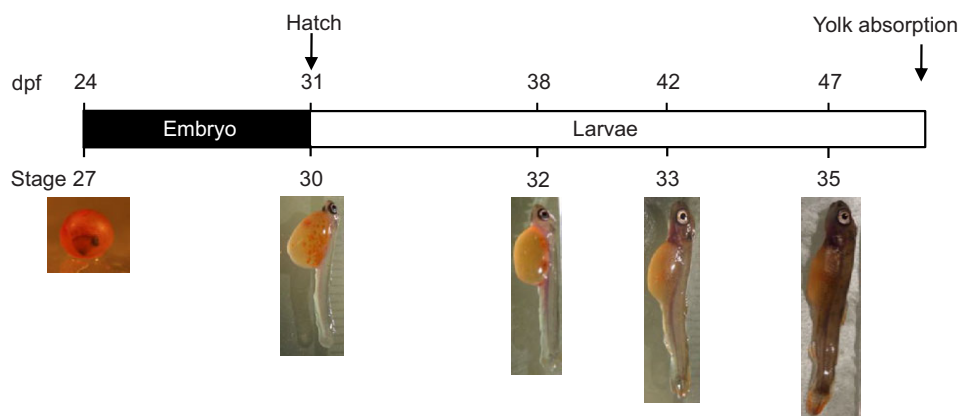

Fig. 1. Timeline in days post fertilization (dpf) of early rainbow trout (*Oncorhynchus mykiss*) developmental stages (Vernier, 1969) in normoxia ( $10^\circ\text{C}$ ).

of blood properties before and after the commencement of Hb turnover from embryonic to adult isoforms, which begins 1 day before hatch (Vernier stage 29) (Iuchi and Yamamoto, 1983). With yolk removed, embryo tissue mass and length were recorded at each stage.

#### Blood collection

Embryos were dechorionated and embryos and alevins were kept on ice during blood collection to prevent blood clotting. The tail was severed with a razor blade and whole blood was drawn by capillary action into either a 60 mm heparinized microhematocrit tube (VWR International LLC, Mississauga, ON, Canada) or into a 5  $\mu$ l unheparinized glass micropipette (Drummond Scientific Company, Broomall, PA, USA). Ammonium heparin and EDTA were found to affect O<sub>2</sub> dissociation curves in microliter blood samples. Therefore, untreated tubes were used to collect blood for O<sub>2</sub> affinity measurements and heparinized tubes were used to collect blood for all other measurements; however, we found that cooling the blood was sufficient to prevent clotting and only unclotted samples were used.

#### Analyses

##### Blood–O<sub>2</sub> affinity

O<sub>2</sub> equilibrium curves (OEC) were determined using a custom-built spectrophotometer (P<sub>wec</sub>50, La Trobe University, Melbourne, Australia), as described previously (Clark et al., 2008). The P<sub>wec</sub>50 is composed of two parts: a gas mixer and an analyzer. The gas mixer mixes compressed O<sub>2</sub>, CO<sub>2</sub> and N<sub>2</sub> according to user-defined parameters. Constant, low flows of gas mixtures from the gas mixer to the analyzer are controlled by a solenoid. Gas delivered to the analyzer is humidified before it enters a temperature-controlled, gas-tight sample chamber. The sample chamber contains light-emitting diodes (LEDs) at 435 and 390 nm, approximately the peak absorption for deoxygenated Hb (Iuchi, 1973b) and the isosbestic point [i.e. the wavelength at which absorption is independent of O<sub>2</sub> saturation (Hoxter, 1979)] between oxy- and deoxy-Hb, respectively. Whole-blood samples (~0.5  $\mu$ l) were smeared between two 6  $\mu$ m gas-permeable polyethylene membranes (Glad Go-Between Freezer Film, Hobart, Tasmania, Australia) held taut over a ring-shaped sample holder with a neoprene O-ring. The sample holder was placed into the sample chamber, with the blood sample positioned between the LEDs and a spectrophotometer, which records the sample absorbance at each wavelength. Within the sample chamber, OEC measurements were performed at 10°C. First, the P<sub>100</sub> (absorbance at maximum percentage O<sub>2</sub> saturation, using P<sub>CO<sub>2</sub></sub> 0.2 kPa, P<sub>N<sub>2</sub></sub> 77.8 kPa and P<sub>O<sub>2</sub></sub> 22 kPa) and P<sub>0</sub> (absorbance at P<sub>O<sub>2</sub></sub> 0 kPa, using P<sub>CO<sub>2</sub></sub> 0.2 kPa and P<sub>N<sub>2</sub></sub> 99.8 kPa) were recorded. The sample was then flushed with stepwise changes in O<sub>2</sub> and N<sub>2</sub>: O<sub>2</sub> saturation was increased by 0.5 kPa until 22 kPa was reached and total gas pressure was balanced with decreasing levels of N<sub>2</sub>. At each O<sub>2</sub> saturation increment, the absorbance at 390 and 435 nm was recorded and used to construct an O<sub>2</sub> saturation curve. This was repeated at P<sub>CO<sub>2</sub></sub> 0.4 and 1.2 kPa in order to determine the extent of the Bohr and Root shifts in Hb from each blood sample. The three CO<sub>2</sub> levels 0.2, 0.4 and 1.2 kPa represent the arterial, venous and post-exercise P<sub>CO<sub>2</sub></sub>, respectively, in adult rainbow trout (Stevens and Randall, 1967; Nikinmaa and Soivio, 1979; Currie and Tufts, 1993). Using these O<sub>2</sub> saturation curves, the P<sub>50</sub>, n<sub>H</sub> and Root effect were automatically calculated using a manufacturer-provided Excel spreadsheet.

The extent of the Bohr effect was calculated from P<sub>CO<sub>2</sub></sub> 0.2 to 0.4 kPa and from 0.2 to 1.2 kPa using the formula (Bohr et al., 1904):

$$\text{Bohr effect} = \Delta \log P_{50} / \Delta \text{pH}. \quad (1)$$

Because of the small volumes of each blood sample, measurements of P<sub>50</sub> and pH were not possible in the same sample. Therefore, individual changes in P<sub>50</sub> within the same treatment group and developmental stage were divided by an averaged  $\Delta$ pH value from stage- and treatment-matched embryos.

Whole-blood pH was measured following methods similar to those of Patrick et al. (Patrick et al., 1997) and Wood et al. (Wood et al., 2010). Blood was extracted from six embryos (~6  $\mu$ l total collected over ~2 min), pooled in a 0.5 ml microcentrifuge tube and covered with Parafilm (Fisher, Markham, ON, Canada). Blood samples were sequentially equilibrated to humidified P<sub>CO<sub>2</sub></sub> 0.2, 0.4 and 1.2 kPa (10°C) using Wöstoff gas-mixing pumps (Bochum, Germany). In preliminary experiments, it was found that 5 min incubation at each P<sub>CO<sub>2</sub></sub> was sufficient to allow for thorough gas mixing with the blood. Between incubation periods, a micro pH electrode (MI-710 combination pH electrode, Microelectrodes, Inc., Bedford, NH, USA) was used to measure pH and was calibrated using pH 4.0, 7.0 and 10.0 buffers (Fisher Scientific, Fair Lawn, NJ, USA).

##### Erythrocyte measurements

All microscopic measurements were made using a digital camera mounted on a light microscope (Leica DM1000, Leica Microsystems, Inc., Concord, ON, Canada) and OpenLab software (Improvision Incorporated, Lexington, KY, USA). To determine erythrocyte morphology, whole-blood samples (~1  $\mu$ l) were diluted on a glass slide in Cortland's isotonic saline (1  $\mu$ l) (Wolf, 1963). Slides were examined immediately (<5 min). The height and width of 20 erythrocytes per slide were measured, and erythrocyte shape was quantified by calculating erythrocyte height to width ratios (H:W). Preliminary results showed that the round embryonic erythrocytic shape persisted into larval stages in hypoxic *O. mykiss*. In adult *O. mykiss*, erythrocyte morphology is altered by elevated levels of catecholamines in hypoxia (Nikinmaa and Huestis, 1984). Therefore, we investigated whether catecholamines were responsible for the observed variations in erythrocytic morphology in early development by incubating blood samples in a 3 $\times$  volume of adrenaline (10<sup>-4</sup> mol l<sup>-1</sup>; Sigma-Aldrich, St Louis, MO, USA) dissolved in Cortland's saline (Wolf, 1963) or in Cortland's saline without adrenaline for 30 min at room temperature. Preliminary experiments [as well as previous work (Tufts and Randall, 1989; Nikinmaa and Huestis, 1984)] revealed that this incubation time was sufficient to allow for significant erythrocytic swelling in adult *O. mykiss* blood. The projected erythrocyte surface area was then measured using OpenLab software. All measurements were calibrated using a stage micrometer (Nikon Stage Micrometer A MBM11100 1 mm, Nikon, Mississauga, ON, Canada).

The erythrocyte counts were determined by preparing a blood dilution (1:300) using Cortland's isotonic saline (Wolf, 1963). Erythrocytes were counted using a standard hemocytometer (Strober, 1997) where every red blood cell (RBC) in the counting area was tallied.

For hematocrit (Hct) measurements, blood was centrifuged at maximum speed for 2 min in an International Clinical Centrifuge (model CL, International Equipment Co., Needham, MA, USA). To accurately determine Hct values on microliter blood samples, pictures of the microhematocrit tubes were taken using a digital camera (Lumix DMC-ZS3, Panasonic Canada Inc., Mississauga, ON, Canada) and analyzed as the percentage of erythrocytes in the sampled blood volume using ImageJ imaging software (US National Institutes of Health, Bethesda, MD, USA).

Mean corpuscular volume (MCV), mean corpuscular Hb (MCH) and mean corpuscular Hb concentration (MCHC), corresponding

to the size of the erythrocytes, the amount of Hb per erythrocyte and the amount of Hb per unit volume, respectively, were calculated using the standard formulae (Sarma, 1990).

#### Hb isoform expression

To determine the expression of Hb<sub>E</sub> mRNA, total RNA was extracted from whole embryos and larvae. RNA extraction and cDNA synthesis were performed following the methods of Essex-Fraser et al. (Essex-Fraser et al., 2005), where an extra TRIzol (Invitrogen Life Technologies, Carlsbad, CA, USA) extraction step was added to remove extra insoluble materials associated with yolk proteins. Real-time PCR was performed on cDNA products using the ABI Prism 7000 sequence detection system (Applied Biosystems, Foster City, CA, USA). Each PCR reaction contained 12.5 µl 2× QuantiTect SYBR Green PCR Master Mix (Qiagen, Toronto, ON, Canada), 5.5 µl RNase-free water (Sigma-Aldrich), 5 µl cDNA template or no-RT controls, and 1 µl each of forward and reverse primers. PCR was performed according to the manufacturer's protocol. A dissociation cycle was performed from 60 to 90°C to ensure that the amplification signal resulted from a single PCR product. To account for differences in amplification efficiency, standard curves were constructed for each primer using serial dilutions of pooled cDNA from randomly selected whole rainbow trout embryos. The relative dilution of each unknown sample was extrapolated by linear regression of the target-specific standard curve using the sample's threshold cycle. To correct for differences in RNA loading and reverse transcriptase efficiencies, each sample was normalized to the expression level of the housekeeping gene elongation factor 1 alpha (EF1-α), which did not significantly vary across developmental stages or with hypoxia treatment and has been used previously as a housekeeping gene in early rainbow trout development (Coulibaly et al., 2006). Samples were run in triplicate with only one target gene assayed per well. Non-reverse transcribed RNA and water-only controls were run to ensure that reagents were not contaminated and that no genomic DNA was being amplified.

Primer sets were designed based on the coding sequences for *O. mykiss* EF1-α (Aegerter et al., 2004) and rainbow trout Hb<sub>E</sub> subunits α-1, α-2, β-1 and β-2 (Maruyama et al., 1999) using PrimerExpress 2.0 software (Applied Biosystems). Primer pairs and accession numbers are listed in Table 1. We were unable to design primers specific for Hb<sub>A</sub> as there are discrepancies in the literature regarding the number of Hb<sub>A</sub> isoforms that exist in adult rainbow trout, reporting anywhere from four to nine distinct isoforms (Binotti et al., 1971; Weber et al., 1976; Ronald and Tsuyuki, 1971; Fago et al., 2001). In addition, there is too much sequence similarity between the Hb<sub>A</sub> isoforms and the Hb<sub>E</sub> isoforms to specifically target Hb<sub>A</sub> and not Hb<sub>E</sub> (Bossa et al., 1976; Maruyama et al., 1999).

Whole-blood Hb concentration was quantified by the cyanmethemoglobin method modified for small volumes (0.5–2.0 µl). Blood samples were transferred to 1.5 ml centrifuge tubes containing 1 µl EDTA. For each set of samples, a standard curve was made by serially diluting Hb standard (Pointe Scientific,

Inc., Canton, MI, USA) in Cortland's isotonic saline (Wolf, 1963); each standard dilution also contained 1 µl EDTA. Samples and standards were mixed with 0.5 ml modified Drabkin's reagent (Nestel and Taylor, 1997). Following incubation at room temperature for 5 min, absorbance was measured spectrophotometrically (SpectraMax 190, Molecular Devices, Sunnyvale, CA, USA) at 540 nmol l<sup>-1</sup>. The concentration of each sample was extrapolated by linear regression using the Hb standard curve, while correcting for the initial blood volume.

#### Statistical analysis

Because only small blood volumes could be collected from rainbow trout embryos, it was not possible to perform repeated measurements on each individual. As a result, averaged Hb, Hct and erythrocyte counts were used to calculate the RBC indices MCV, MCH and MCHC. Consequently, raw data were not available for these variables and statistical comparisons were not possible.

Three-way ANOVAs were used to determine the overall effects of developmental stage, O<sub>2</sub> treatment and P<sub>CO2</sub> on pH, P<sub>50</sub> and *n*<sub>H</sub>. A three-way ANOVA was also used to determine the overall effects of developmental stage, O<sub>2</sub> treatment and adrenaline treatment on erythrocyte surface area. A one-way repeated-measures ANOVA was used to determine statistical differences in time to reach each developmental stage among O<sub>2</sub> treatments. Two-way ANOVAs were employed to assess the overall effects of developmental stage and O<sub>2</sub> treatment on the mean values of all remaining data. In the case of the Bohr and Root effects, this involved analyzing the data separately for each CO<sub>2</sub> level. Data for mass, Hb concentration, P<sub>50</sub> and Hb<sub>E</sub> mRNA expression were log transformed in order to meet the assumptions of normality and equal variance. Where significant effects were present, factors were compared using Tukey's *post hoc* analyses. Statistical analyses were performed using SigmaPlot version 11.0 (Systat Software, Inc., San Jose, CA, USA). All statistical tests were performed at the 0.05 level. Estimates are reported as means ± s.e.m.

## RESULTS

### *Oncorhynchus mykiss* growth and metabolism

In normoxia-reared *O. mykiss*, tissue mass (without yolk) increased ninefold between Stages 27 (24 dpf) and 35 (47 dpf; Fig. 2). In all except Stage 33, tissue mass was significantly reduced (20–50%) in hypoxic embryos and larvae relative to stage-matched normoxic embryos and larvae (*P*<0.01); however, there was still an eightfold increase in tissue mass from Stage 27 (29 dpf) to Stage 35 (62 dpf) in hypoxia. Overall, development was delayed by ~15 days to reach Stage 35 in hypoxia-reared relative to normoxia-reared rainbow trout (*P*<0.05). There was no effect of hypoxia treatment on tissue lactate levels at any developmental stage (*P*=0.2, data not shown).

### Hb–O<sub>2</sub> binding and carrying capacity

The shape of the OEC was altered by development and P<sub>CO2</sub>, but not by hypoxia (Fig. 3). The OEC shifted to the right as development progressed. In addition, maximum blood O<sub>2</sub> saturation was reduced

Table 1. Primer set sequences used for real-time PCR

| Target              | GenBank accession no. | Forward primer            | Reverse primer             | Size (bp) |
|---------------------|-----------------------|---------------------------|----------------------------|-----------|
| EF1-α               | AF498320              | AGCGCAATCAGCCTGAGAGGTA    | GCTGGACAAGCTGAAGGCTGAG     | 160       |
| Hb <sub>E</sub> α-1 | AB015448              | GCCCTGGCTCTGTCTGAGAA      | ATTGGCACCCCTACAAGATTGTC    | 74        |
| Hb <sub>E</sub> α-2 | AB015449              | CTTCAAGATCATCAACCACAACATC | GGGTAAGTCGTCAGGGAACAG      | 64        |
| Hb <sub>E</sub> β-1 | AB015450              | CACTAGAGCCCCCTCACTCAGA    | AACATGTGCCTCTAAACAAATGATCT | 146       |
| Hb <sub>E</sub> β-2 | AB015451              | CTTCAAGATCATCAACCACAACATC | GGGTAAGTCGTCAGGGAACAG      | 97        |

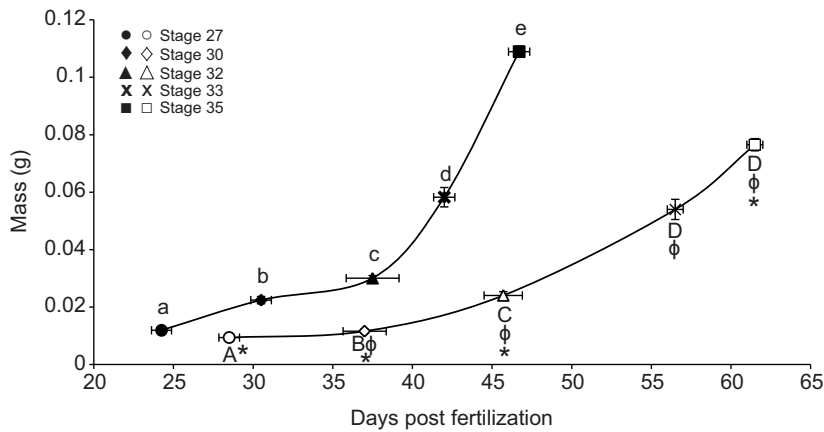

Fig. 2. Changes in tissue mass (yolk removed) and developmental rate in rainbow trout (*Oncorhynchus mykiss*) embryos and larvae reared in normoxia (100% of  $O_2$  saturation; filled symbols) and hypoxia (30% of  $O_2$  saturation; open symbols). Different letters (lowercase, normoxia; uppercase, hypoxia) indicate significant differences in mass among developmental stages, and asterisks indicate significant differences in mass from the normoxic group.  $\phi$  indicates significant differences in time of development to a specific stage from the normoxic group. Data are presented as means  $\pm$  s.e.m. ( $N=10$  for mass and 3 for developmental rate).

with increasing  $P_{CO_2}$  and these reductions became more pronounced in later developmental stages.

Developmental stage and  $CO_2$  level significantly affected  $P_{50}$  (three-way ANOVA, developmental stage  $F_{4,33}=142.01$ ,  $P<0.001$ ;  $CO_2$  level  $F_{2,22}=45.89$ ,  $P<0.001$ ; Table 2). There was a twofold increase in  $P_{50}$  between Stages 27 and 35 ( $P<0.001$ ). Changes in  $P_{CO_2}$  from 0.2 to 0.4 kPa significantly increased  $P_{50}$  at Stages 33 and 35 ( $P<0.001$ ), while changes in  $P_{CO_2}$  from 0.2 to 1.2 kPa significantly increased  $P_{50}$  at all developmental stages ( $P<0.001$ ).  $P_{50}$  was unaffected by hypoxia treatment ( $P=0.1$ ; Table 2).

From Stage 27 to 35, there was a 30% ( $P_{CO_2}$  0.2 to 0.4 kPa,  $P<0.03$ ) to 40% (0.2 to 1.2 kPa,  $P<0.002$ ) decrease in maximum  $O_2$  saturation (Root effect; Table 2). There was a significant increase in the Bohr effect between Stages 27 and 35 at both  $P_{CO_2}$  levels (0.2 to 0.4 kPa  $P<0.02$ ; 0.2 to 1.2 kPa  $P<0.001$ ; Table 2). Hypoxia treatment did not alter the Root effect at either  $P_{CO_2}$  level ( $P=0.3$ ) or the Bohr effect at higher  $P_{CO_2}$  ( $P=0.8$ ). However, at 0.4 kPa, the Bohr effect was twofold to threefold higher in hypoxia-reared larvae at Stages 32 ( $P=0.012$ ) and 33 ( $P<0.001$ ) relative to normoxia-reared larvae.

Between Stages 27 and 35 in normoxic development, there was a decrease in  $n_H$  of 27% at  $P_{CO_2}$  0.2 kPa ( $P<0.001$ ), 37% at 0.4 kPa ( $P<0.001$ ) and 34% at 1.2 kPa ( $P<0.001$ ; Table 2). We also observed an 18% reduction in  $n_H$  at Stage 30 when  $P_{CO_2}$  was raised from 0.2 to 1.2 kPa ( $P=0.02$ ). Hypoxia treatment had no effect on  $n_H$  at any  $P_{CO_2}$  level ( $P=0.28$ ).

#### Blood parameters and RBC indices

In normoxia, whole-blood Hb concentration and Hct significantly decreased at Stages 30–32 relative to earlier stages ( $P=0.04$ ), but

recovered by Stages 33–35 (whole-blood Hb  $P<0.001$ , Fig. 4A; whole-blood Hct  $P<0.04$ , Fig. 4B). In contrast, erythrocyte counts significantly increased (+50%) between Stages 27 and 35 ( $P<0.001$ ; Fig. 4C). In hypoxia-reared embryos and larvae, there was a profound reduction in whole-blood Hb concentration (38–53%), Hct (17–65%) and erythrocyte counts (33–65%) relative to normoxia ( $P<0.001$ ; Fig. 4). Hb concentrations and erythrocyte counts followed a similar ontogenetic pattern in hypoxia relative to normoxia (Fig. 4A,C). We also observed a 1.7-fold increase in Hct between Stages 27 and 32 in hypoxia ( $P=0.02$ ), and Hct remained stable from Stage 32 onward ( $P>0.96$ , Fig. 4B).

MCV and MCH decreased 2.5- and 1.7-fold, respectively, between Stages 27 and 35 during normoxic development (Table 3). However, MCHC showed no clear ontogenetic pattern, but increased by 45% between Stages 33 and 35. Hypoxia treatment did not appear to alter RBC indices relative to the normoxic group. From Stage 27 to 35 in hypoxia, we observed a decrease in MCV (–67%) and MCH (–75%). Additionally, MCHC decreased between Stages 27 and 30 in hypoxia-reared embryos (–28%) and there were no notable changes in later developmental stages.

#### Erythrocyte morphology

The H:W of erythrocytes from normoxia-reared embryos and larvae was low and stable between Stages 27 and 32, but then significantly increased (+12%,  $P<0.001$ ; Fig. 5A). In hypoxia, the H:W of erythrocytes was significantly reduced at Stages 33 (–7%) and 35 (–9%,  $P<0.001$ ) relative to erythrocytes from normoxia-reared individuals. Fig. 5B and 5C show oval erythrocytes from normoxia-

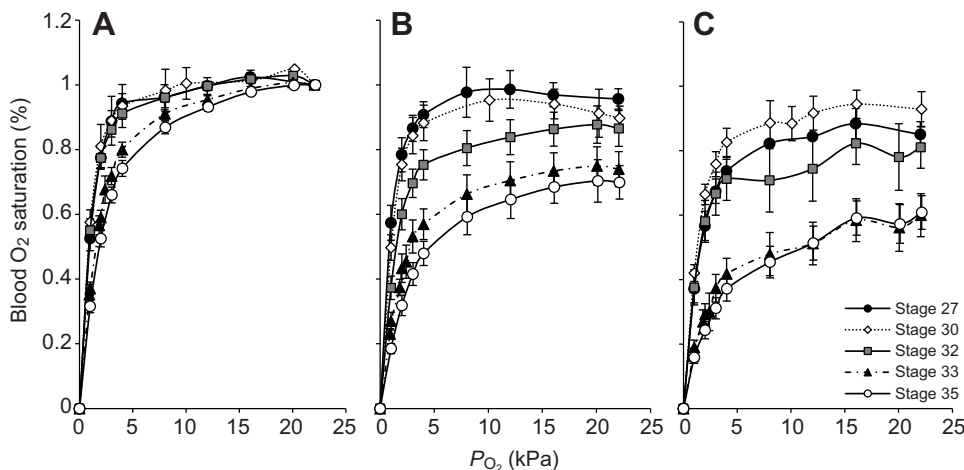

Fig. 3. Changes in Hb– $O_2$  dissociation curves in rainbow trout (*Oncorhynchus mykiss*) embryos and larvae with development and with  $P_{CO_2}$  increases from 0.2 kPa (A) to 0.4 (B) and 1.2 kPa (C).  $O_2$  treatment had no effect on dissociation curves and therefore normoxia (100% of  $O_2$  saturation) and hypoxia (30% of  $O_2$  saturation) data were pooled. Data are presented as means  $\pm$  s.e.m. ( $N=6-10$ ).

Table 2. Oxygen transport variables ( $P_{50}$ , Hill coefficients, and Bohr and Root effects) at 0.2, 0.4 and 1.2 kPa CO<sub>2</sub> in rainbow trout (*Oncorhynchus mykiss*) reared in normoxia (100% of O<sub>2</sub> saturation) or hypoxia (30% of O<sub>2</sub> saturation) over a developmental series

|                                         | Developmental stage | Normoxia                 |                           |                              | Hypoxia                 |                           |                         |
|-----------------------------------------|---------------------|--------------------------|---------------------------|------------------------------|-------------------------|---------------------------|-------------------------|
|                                         |                     | 0.2 kPa CO <sub>2</sub>  | 0.4 kPa CO <sub>2</sub>   | 1.2 kPa CO <sub>2</sub>      | 0.2 kPa CO <sub>2</sub> | 0.4 kPa CO <sub>2</sub>   | 1.2 kPa CO <sub>2</sub> |
| $P_{50}$ (kPa)                          | 27                  | 1.13±0.13 <sup>a</sup>   | 0.90±0.08 <sup>a,b</sup>  | 1.37±0.16 <sup>a,+</sup>     | 0.93±0.07               | 0.87±0.08                 | 1.41±0.16               |
|                                         | 30                  | 0.91±0.04 <sup>a</sup>   | 1.15±0.16 <sup>a</sup>    | 1.18±0.07 <sup>b,+</sup>     | 0.79±0.03               | 0.95±0.05                 | 1.16±0.09               |
|                                         | 32                  | 0.98±0.07 <sup>b</sup>   | 1.27±0.12 <sup>b</sup>    | 1.33±0.11 <sup>a,b,c,+</sup> | 1.00±0.08               | 1.31±0.07                 | 1.29±0.13               |
|                                         | 33                  | 1.58±0.12 <sup>c</sup>   | 1.67±0.13 <sup>c,+</sup>  | 2.15±0.13 <sup>c,d,+</sup>   | 1.60±0.10               | 1.80±0.14                 | 2.26±0.10               |
|                                         | 35                  | 2.10±0.13 <sup>c</sup>   | 2.67±0.19 <sup>c,+</sup>  | 3.17±0.14 <sup>d,+</sup>     | 1.89±0.11               | 2.19±0.15                 | 2.84±0.14               |
| Hill coefficient                        | 27                  | 1.88±0.10 <sup>a</sup>   | 2.02±0.13 <sup>a</sup>    | 1.87±0.14 <sup>a</sup>       | 1.88±0.15               | 1.86±0.29                 | 1.65±0.17               |
|                                         | 30                  | 1.94±0.11 <sup>a,b</sup> | 1.74±0.15 <sup>a,b</sup>  | 1.60±0.08 <sup>a,b,+</sup>   | 1.59±0.11               | 1.64±0.13                 | 1.43±0.16               |
|                                         | 32                  | 1.44±0.07 <sup>b,c</sup> | 1.39±0.07 <sup>b,c</sup>  | 1.37±0.05 <sup>b</sup>       | 1.69±0.07               | 1.48±0.07                 | 1.46±0.06               |
|                                         | 33                  | 1.49±0.07 <sup>c</sup>   | 1.34±0.05 <sup>c</sup>    | 1.23±0.05 <sup>b</sup>       | 1.34±0.04               | 1.23±0.03                 | 1.22±0.07               |
|                                         | 35                  | 1.38±0.06 <sup>c</sup>   | 1.27±0.07 <sup>c</sup>    | 1.23±0.07 <sup>b</sup>       | 1.49±0.04               | 1.35±0.04                 | 1.26±0.04               |
| Bohr effect                             | 27                  |                          | 0.02±0.10 <sup>a</sup>    | -0.47±0.13 <sup>a,b</sup>    |                         | -0.43±0.12 <sup>A</sup>   | -0.41±0.14              |
|                                         | 30                  |                          | -0.51±0.10 <sup>a,b</sup> | -0.68±0.14 <sup>a,b</sup>    |                         | -0.63±0.18 <sup>A,B</sup> | -0.65±0.11              |
|                                         | 32                  |                          | -0.42±0.18 <sup>a,b</sup> | -0.50±0.10 <sup>a</sup>      |                         | -1.0±0.2 <sup>A,B,*</sup> | -0.38±0.07              |
|                                         | 33                  |                          | -0.43±0.04 <sup>a,b</sup> | -0.90±0.15 <sup>b,c</sup>    |                         | -1.4±0.3 <sup>B,*</sup>   | -0.99±0.04              |
|                                         | 35                  |                          | -0.79±0.12 <sup>b</sup>   | -0.99±0.14 <sup>c</sup>      |                         | -0.82±0.14 <sup>A,B</sup> | -1.1±0.1                |
| Max. Hb saturation (%)<br>(Root effect) | 27                  |                          | 97.0±1.1 <sup>a</sup>     | 81.1±2.3 <sup>a</sup>        |                         | 90.6±2.8                  | 87.6±4.9                |
|                                         | 30                  |                          | 87.7±3.3 <sup>a</sup>     | 89.4±3.4 <sup>a</sup>        |                         | 87.0±4.2                  | 94.3±3.8                |
|                                         | 32                  |                          | 79.3±7.3 <sup>a,b</sup>   | 80.6±7.5 <sup>a</sup>        |                         | 88.8±1.8                  | 80.4±5.0                |
|                                         | 33                  |                          | 71.4±5.9 <sup>b,c</sup>   | 58.4±6.7 <sup>b</sup>        |                         | 71.0±4.2                  | 61.5±6.6                |
|                                         | 35                  |                          | 66.0±4.7 <sup>c</sup>     | 62.0±6.0 <sup>b</sup>        |                         | 73.0±5.0                  | 59.8±4.4                |

Data are presented as means ± s.e.m. (N=6–10).

Different superscripted lowercase and uppercase letters represent significant differences in the normoxic and hypoxic groups, respectively. + Indicates significant differences from 0.2 kPa CO<sub>2</sub>. \* Indicates significant differences from the normoxic group.

reared Stage 35 larvae and round erythrocytes from hypoxia-reared Stage 35 larvae, respectively.

In normoxic development, the projected surface area increased after Stage 27, was highest at Stage 30 and decreased thereafter ( $P<0.001$ ; Fig. 6). Adrenaline caused erythrocytes to swell in normoxia-reared *O. mykiss*, which was significant at Stage 32 ( $P<0.001$ ). In hypoxia, the projected surface area significantly increased after Stage 27, was highest at Stage 32 ( $P<0.001$ ) and returned to initial values by Stage 35 ( $P=1.00$ ). The projected surface area of erythrocytes from hypoxia-reared *O. mykiss* was greater at all developmental stages, from 11% at Stage 27 to 38% at Stage 33, relative to Cortland's-treated normoxic erythrocytes ( $P<0.001$ ). No adrenaline-induced swelling was apparent at any developmental stage in hypoxia-reared rainbow trout.

#### Hb isoform expression

In normoxia-reared embryos and larvae, mRNA expression of embryonic Hb isoforms was significantly higher earlier in development relative to later in development ( $P<0.001$ ; Fig. 7). In hypoxia-reared larvae, mRNA levels of Hb<sub>E</sub> β-2 at Stage 33 ( $P=0.002$ ; Fig. 7D) and of Hb<sub>E</sub> α-1 and β-1 at Stages 33 and 35 were threefold to sixfold greater ( $P<0.01$ ; Fig. 7A,B) than in the normoxic group. Hb<sub>E</sub> α-2 mRNA levels were unaffected by hypoxia treatment ( $P>0.2$ ; Fig. 7C).

#### DISCUSSION

The retention of rounder, embryonic erythrocytes and elevated Hb<sub>E</sub> mRNA concentrations in hypoxia support the hypothesis that *O. mykiss* are capable of plasticity in the ontogenetic onset of Hb turnover. However, higher concentrations of the embryonic erythrocyte and Hb<sub>E</sub> in hypoxia-reared relative to normoxia-reared larvae did not result in a higher Hb–O<sub>2</sub> affinity, as might be expected, suggesting that other factors may be involved. The hypoxia-induced

delay in Hb and erythrocyte turnover may occur either as a result of a general reduction of protein synthesis in hypoxia – which is also suggested by the concomitant decrease in growth and developmental rate in hypoxia-reared embryos and larvae – or as a result of a more specific and regulated decrease in erythropoiesis (see below). Chronic hypoxia exposure dramatically reduced Hb concentration, Hct and erythrocyte counts in embryos and larvae relative to stage-matched normoxic controls. Thus, the enhancement of blood–O<sub>2</sub> transport previously observed in adult trout exposed to chronic hypoxia (Soivio et al., 1980; Nikinmaa, 1983; Lai et al., 2006) was absent or altered in early life stages prior to complete yolk absorption. However, the retention of Hb<sub>E</sub> and of rounder erythrocytes, along with developmentally appropriate  $P_{50}$  values (i.e. similar to stage-matched normoxic group) in larvae exposed to chronic hypoxia suggests that other factors (e.g. intraerythrocytic adenylate levels) may be changed to achieve the best balance between O<sub>2</sub> loading and unloading of Hb at this stage of development.

#### The ontogeny of rainbow trout blood properties

Our study is the first to outline the ontogenetic sequence of blood–O<sub>2</sub> binding characteristics in early *O. mykiss* development at physiological temperatures using individual blood samples. Iuchi (Iuchi, 1973b) described the O<sub>2</sub> binding properties of *O. mykiss* Hb<sub>E</sub> but the measurements were taken between 25 and 28°C, which is higher than the rainbow trout's normal physiological temperatures. At a lower temperature, Hb<sub>E</sub> exhibited an increased O<sub>2</sub> affinity, reduced cooperativity, and greater Bohr effect relative to values reported previously by Iuchi (Iuchi, 1973b) at 25–28°C, which is also observed in Hb<sub>A</sub> as temperature decreases (Weber et al., 1976; Vorger, 1985). Therefore, trout Hb<sub>E</sub> and Hb<sub>A</sub> responded in a similar manner to a reduction in temperature. In addition, Iuchi (Iuchi, 1973b) only investigated the Hb–O<sub>2</sub> binding properties in newly

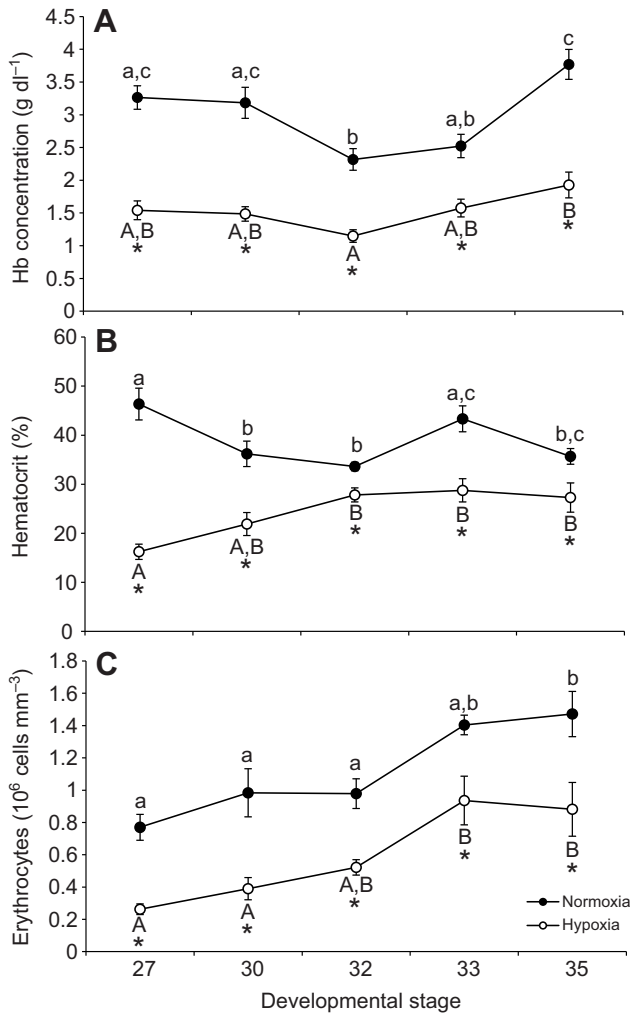

Fig. 4. Whole-blood Hb protein concentration (A), hematocrit (B) and erythrocyte counts (C) in various developmental stages of rainbow trout (*Oncorhynchus mykiss*) embryos and larvae reared in normoxia (100% of  $O_2$  saturation; black circles) or hypoxia (30% of  $O_2$  saturation; white circles). Different letters (lowercase, normoxia; uppercase, hypoxia) indicate significant differences among developmental stages and asterisks indicate significant differences from the normoxic group. Data are presented as means  $\pm$  s.e.m. ( $N=6-10$ ).

hatched larvae and compared this with the binding properties of 2-year-old trout. In contrast, we measured Hb- $O_2$  binding properties in pre-hatch embryos and in several larval stages during the transition from Hb<sub>E</sub> to Hb<sub>A</sub>. Furthermore, Iuchi (Iuchi, 1973b) euthanized

100–3000 individuals for each measurement. Presumably samples were pooled because of the difficulties in extracting sufficient blood volumes from small individuals. This approach would disguise the true biological variability among individuals. We developed a method of efficiently extracting blood from *O. mykiss* embryos and larvae and optimized several techniques for assaying numerous hematological parameters on microliter (0.5–2  $\mu$ l) blood samples. These techniques can now be applied to more fully characterize blood homeostasis in response to a variety of environmental perturbations during early development and in species of small fishes.

Although Iuchi (Iuchi, 1973a) previously tracked the turnover of embryonic erythrocytes for adult erythrocytes, our study is the first to illustrate how Hb turnover affects blood- $O_2$  binding characteristics over an ontogenetic series. Our data indicate that the Hb<sub>E</sub> to Hb<sub>A</sub> turnover occurred between Stages 32 and 33 in normoxia: the OEC shifted to the right,  $P_{50}$  increased (lower affinity) and  $n_H$  decreased (lower cooperativity) after Stage 32. In addition, the erythrocyte H:W substantially increased between Stages 32 and 33, which signifies a predominance of the oval-shaped adult erythrocyte (Iuchi, 1973a) relative to earlier ontogenetic stages. Furthermore, Hb<sub>E</sub>  $\alpha$ -1,  $\beta$ -1 and  $\beta$ -2 mRNA expression was highest in Stage 27 embryos and significantly decreased between Stages 32 and 33. These changes were not associated with a decrease in overall Hb protein concentration, implying a replacement of Hb<sub>E</sub> for Hb<sub>A</sub> at the protein level. The Bohr and Root effects also became more pronounced with development. The  $P_{50}$  and Bohr and Root effect values in Stage 35 larvae were similar to those of adult rainbow trout (Eddy, 1971; Weber et al., 1976; Nikinmaa and Soivio, 1979). Taken together, these results indicate that Hb<sub>A</sub> predominates at Stage 35.

We have characterized the detailed ontogenetic changes in Hb concentration, Hct and erythrocyte morphology in rainbow trout. In pre-hatch embryos, we observed a low Hb concentration and high Hct relative to *O. mykiss* adults. Hct was nearly 50%, which is 20% greater than the optimal Hct for  $O_2$  delivery in adult rainbow trout (Wells and Weber, 1991), and may raise blood viscosity and impede circulation (Rand et al., 1964). The erythrocyte volume (MCV) data indicate that the elevated Hct is the consequence of a greater erythrocytic volume in pre-hatch embryos relative to rainbow trout adults (Johansson-Sjöbeck and Larsson, 1979; Řehulka and Adamec, 2004), probably reflecting the relatively larger, more spherical shape of the embryonic erythrocyte (Yamamoto and Iuchi, 1975). In addition, both MCH and MCHC were reduced at Stage 27 relative to values observed in adult rainbow trout (Johansson-Sjöbeck and Larsson, 1979; Boutilier et al., 1988; Řehulka and Adamec, 2004), suggesting a dilution of the embryonic erythrocytic contents. In adult fishes, such a dilution causes a dissociation of ATP-Hb complexes,

Table 3. Developmental changes in mean corpuscular volume (MCV), mean corpuscular hemoglobin (MCH) and mean corpuscular hemoglobin concentration (MCHC) in normoxia- (100% of  $O_2$  saturation) and hypoxia-reared (30% of  $O_2$  saturation) rainbow trout (*Oncorhynchus mykiss*) embryos and larvae

|                              | $O_2$ treatment | Developmental stage |                   |                  |                  |                  |
|------------------------------|-----------------|---------------------|-------------------|------------------|------------------|------------------|
|                              |                 | 27                  | 30                | 32               | 33               | 35               |
| MCV (fl)                     | Normoxia        | 902.7 $\pm$ 113.2   | 551.9 $\pm$ 92.5  | 515.2 $\pm$ 50.1 | 462.9 $\pm$ 34.6 | 363.7 $\pm$ 38.3 |
|                              | Hypoxia         | 927.6 $\pm$ 146.6   | 841.9 $\pm$ 173.8 | 799.3 $\pm$ 83.7 | 458.7 $\pm$ 86.5 | 309.5 $\pm$ 67.5 |
| MCH (pg cell <sup>-1</sup> ) | Normoxia        | 63.6 $\pm$ 7.5      | 48.5 $\pm$ 8.2    | 35.5 $\pm$ 4.2   | 27.0 $\pm$ 2.2   | 38.4 $\pm$ 4.3   |
|                              | Hypoxia         | 88.0 $\pm$ 13.7     | 57.1 $\pm$ 10.9   | 33.0 $\pm$ 4.1   | 25.2 $\pm$ 4.6   | 21.9 $\pm$ 4.7   |
| MCHC (g dl <sup>-1</sup> )   | Normoxia        | 7.0 $\pm$ 0.6       | 8.8 $\pm$ 0.9     | 6.9 $\pm$ 0.5    | 5.8 $\pm$ 0.5    | 10.6 $\pm$ 0.8   |
|                              | Hypoxia         | 9.5 $\pm$ 1.3       | 6.8 $\pm$ 0.9     | 4.1 $\pm$ 0.4    | 5.5 $\pm$ 0.7    | 7.1 $\pm$ 1.1    |

Data are presented as means  $\pm$  s.e.m. ( $N=6-8$ ).

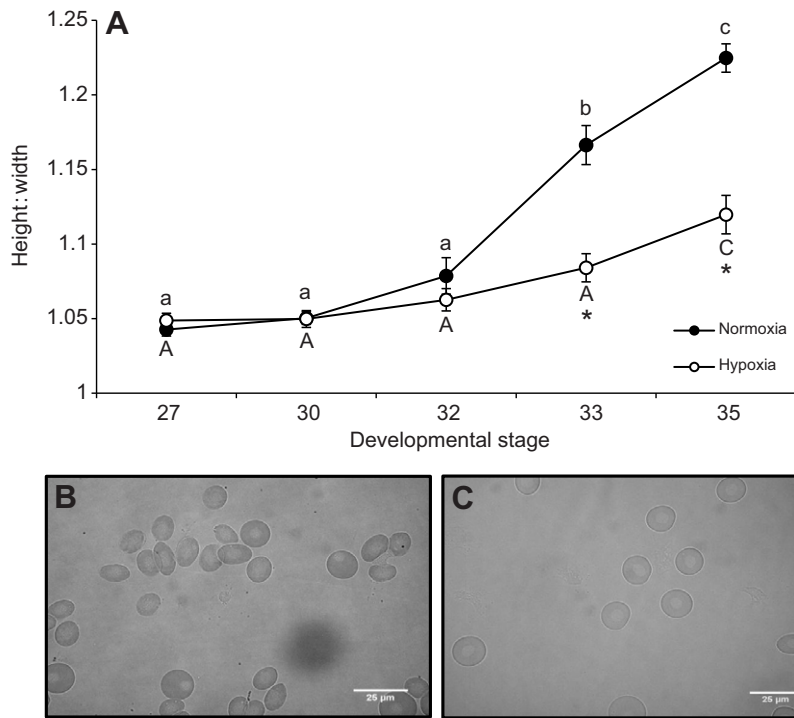

Fig. 5. Changes in erythrocyte shape (A) with development in normoxia (black circles) and hypoxia (white circles) and representative light micrographs of erythrocytes from Stage 35 *Oncorhynchus mykiss* larvae (B, normoxia, 100% of O<sub>2</sub> saturation; C, hypoxia, 30% of O<sub>2</sub> saturation). Different letters (lowercase, normoxia; uppercase, hypoxia) indicate significant differences among developmental stages and asterisks indicate significant differences from the normoxic group. Data are presented as means ± s.e.m. (N=9).

enhancing Hb-O<sub>2</sub> affinity (Nikinmaa, 1983; Nikinmaa and Huestis, 1984), consistent with our embryonic P<sub>50</sub> values.

Although Stage 35 larvae possessed primarily Hb<sub>A</sub>, their RBC indices differed from those of adult *O. mykiss*. At Stage 35, MCV resembled that of adult rainbow trout, while MCH and MCHC were ~50 and ~60% reduced relative to adult trout, respectively (Johansson-Sjöbeck and Larsson, 1979; Boutilier et al., 1988; Řehulka and Adamec, 2004). Therefore, how do *O. mykiss* larvae maintain adequate O<sub>2</sub> uptake with a low concentration of the lower affinity Hb<sub>A</sub>? The direct diffusion of O<sub>2</sub> to the tissues *via* cutaneous

respiration contributes up to ~40% of total O<sub>2</sub> uptake prior to exogenous feeding (Rombough and Ure, 1991; Wells and Pinder, 1996). These results suggest that the turnover of Hb<sub>E</sub> for Hb<sub>A</sub> precedes the complete dependence on Hb<sub>A</sub> for gas exchange.

#### Early ontogenetic strategies for coping with hypoxia

Moderate chronic hypoxia had profound negative impacts on developmental rates and growth, consistent with previous studies (Fig. 1) (Garside, 1966; Miller et al., 2008), as well as distinct alterations of the blood-O<sub>2</sub> transport system. The first possibility is that the decrease in overall Hb concentration and retention of embryonic erythrocytes in stage-matched hypoxia-reared larvae may be associated with a general metabolic depression. Previous work by Miller et al. (Miller et al., 2008) has confirmed that stage-matched trout embryos reduce their metabolic rate during chronic, moderate hypoxia (50% dissolved O<sub>2</sub>). Protein production is typically one of the first metabolic functions to be limited by hypoxia (Buc-Calderon et al., 1993; Land et al., 1993; Land and Hochachka, 1994; Hochachka et al., 1996). In hypoxia it is also possible for the amount of Hb to exceed O<sub>2</sub> availability, and thus the benefit of increasing Hb concentration in hypoxia does not always outweigh the energetic cost of Hb production (Roesner et al., 2006). Moreover, a lower Hct would lower blood viscosity and in turn may lower cardiac energetic requirements (reviewed by Gallaugh and Farrell, 1998) at a time when O<sub>2</sub> is environmentally limited. It should be noted that the parsimonious explanation for the elevation of Hb<sub>E</sub> mRNA levels in hypoxic larvae with lower Hb protein content is that this group has retained embryonic erythrocytes, which continue to express Hb<sub>E</sub> mRNA.

The second possibility is that in hypoxia, embryos and larvae initiate a specific, coordinated response to low O<sub>2</sub> in order to conserve energy. In rainbow trout cells, hypoxia increases the concentration of HIF-1α protein (Soitamo et al., 2001), which is thought to mediate the increase in Hb and erythrocyte concentrations observed in adults during hypoxia exposure (Lai et al., 2006). However, in our study, chronic hypoxia resulted in a profound

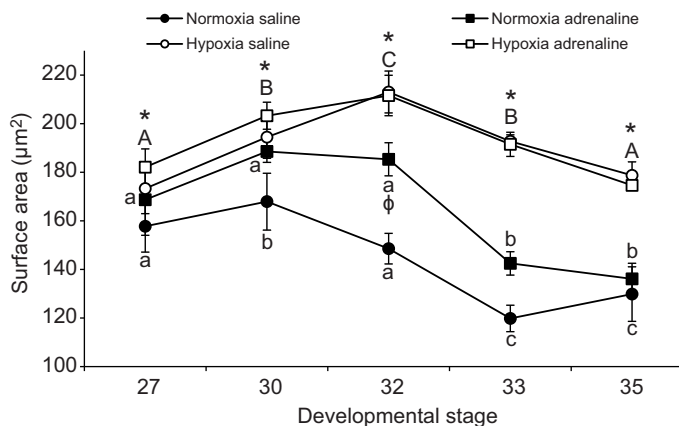

Fig. 6. The effects of adrenaline on erythrocyte swelling. Blood samples from normoxia (100% of O<sub>2</sub> saturation; black symbols) and hypoxia-reared (30% of O<sub>2</sub> saturation; white symbols) *Oncorhynchus mykiss* embryos and larvae at various developmental stages were incubated for 30 min in a 3× volume of 10<sup>-4</sup> mol l<sup>-1</sup> adrenaline (squares) or Cortland's saline (circles). Different letters (lowercase, normoxia; uppercase, hypoxia) indicate significant differences among developmental stages. Within the adrenaline-treated normoxic group, φ indicates a significant difference from the Cortland's-treated, normoxic group. Within the hypoxic group, asterisks indicate significant differences from the Cortland's-treated, normoxic group. Data are presented as mean ± s.e.m. (N=6).



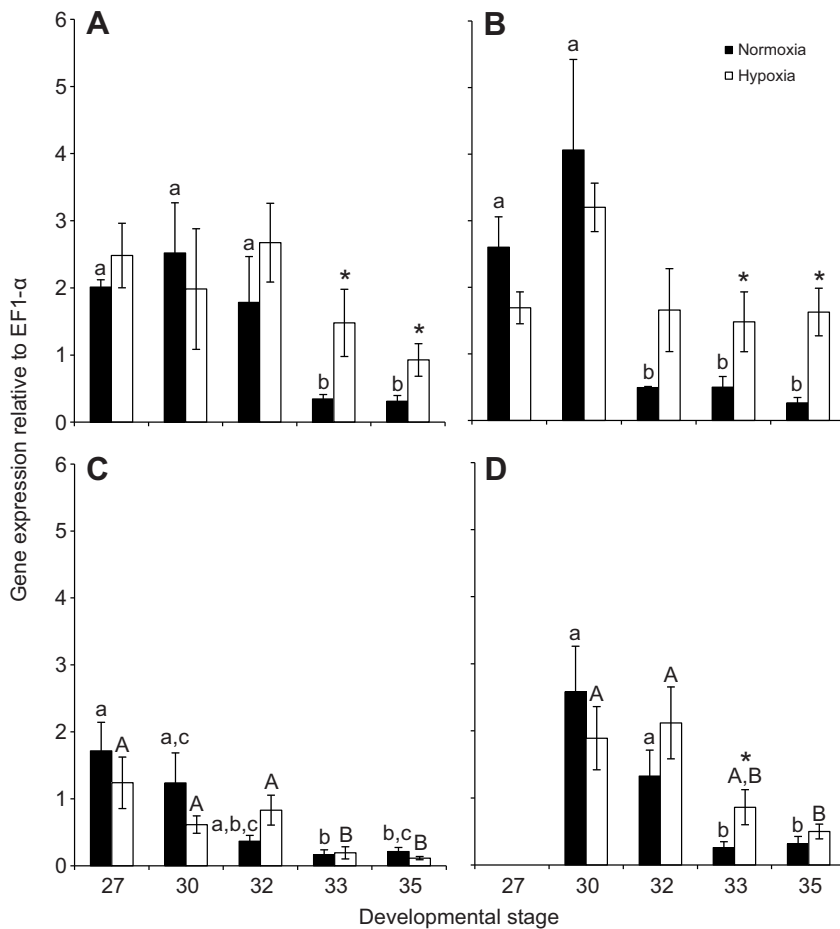

Fig. 7. Developmental pattern of HbE  $\alpha$ -1 (A), HbE  $\beta$ -1 (B), HbE  $\alpha$ -2 (C) and HbE  $\beta$ -2 (D) mRNA expression in whole rainbow trout (*Oncorhynchus mykiss*) embryos and larvae reared in normoxia (100% of O<sub>2</sub> saturation; black bars) or hypoxia (30% of O<sub>2</sub> saturation; white bars). Different letters (lowercase, normoxia; uppercase, hypoxia) indicate significant differences among developmental stages, and asterisks indicate significant differences from the normoxic group. Data are presented as means  $\pm$  s.e.m. (N=4–9).

reduction in Hb and erythrocyte concentrations in embryos and larvae. Although HIF-1 $\alpha$  is expressed in Baltic salmon (*Salmo salar*) and lake trout (*Salvelinus namaycush*) embryos (Vuori et al., 2004; Vuori et al., 2009), there is a lack of information on the HIF-1 mediated response during early salmonid development. It is possible that, similar to zebrafish (Ton et al., 2003), the hypoxia-induced HIF-1 pathway differs between embryonic and adult stages.

The reduced Hb protein and erythrocyte levels in hypoxia may also reflect the dependence on direct diffusion to the tissues for gas exchange, rather than blood convection, during early *O. mykiss* development. Holeyton (Holeyton, 1971) and Iuchi (Iuchi, 1985) suggested that Hb may not be necessary for O<sub>2</sub> consumption in early rainbow trout development (reviewed by Rombough, 1988). Therefore, reduced Hb production in early ontogenetic stages would conserve energy without seriously impeding O<sub>2</sub> uptake. Furthermore, because of their smaller size relative to the normoxic group, hypoxic embryos and larvae may be capable of prolonging the use of diffusion and cutaneous respiration for gas exchange. Indeed, chronic hypoxia exposure (25% of O<sub>2</sub> saturation, 38–47 days) slows gill development, in particular the proliferation of secondary lamellae (McDonald and McMahon, 1977). Thus a delay in the ontogenetic onset of branchial respiration during chronic hypoxia may offset low Hb concentrations.

It is surprising that there were no significant differences in Hb–O<sub>2</sub> affinity, cooperativity or the Root effect in hypoxia relative to the normoxic group. If HbE protein were retained, then we would expect a higher O<sub>2</sub> affinity and cooperativity and no Root effect, which are characteristic of HbE (Iuchi, 1973b). One explanation for this discrepancy is that a developmentally appropriate P<sub>50</sub> value may be

guarded in early life stages regardless of environmental O<sub>2</sub> levels to ensure adequate unloading at the tissues, as seen in some adult teleosts (e.g. Cook et al., 2013). Although hypoxic larvae are developmentally delayed and smaller than their normoxic counterparts, they still experience an eightfold increase in mass between Stages 27 and 35, and their mass is only 7 and 29% less than stage-matched normoxic Stage 33 and 35 larvae, respectively. However, this growth appears to be unaccompanied by a turnover to the lower-affinity Hb<sub>A</sub>, and therefore O<sub>2</sub> unloading at developing tissues could potentially be compromised. Therefore, it is possible that allosteric modification of HbE occurs, which would be an energetically more favorable strategy compared with erythropoiesis in a low-O<sub>2</sub> environment. Furthermore, as others have argued (Brauner and Wang, 1997; Wang and Malte, 2011), a lower Hb–O<sub>2</sub> affinity may elevate venous O<sub>2</sub> content, supplying the heart with more O<sub>2</sub> during hypoxia. Unfortunately, the development of a method to measure RBC adenylates on <2  $\mu$ l samples was beyond the scope of this study.

In rainbow trout adults, hypoxia initiates a stress response and stimulates the release of catecholamines that induce erythrocytic swelling and subsequently raise Hb–O<sub>2</sub> affinity (Nikinmaa, 1983; Nikinmaa and Huestis, 1984; Nickerson et al., 2003). Therefore, we investigated whether the dissimilarities in erythrocyte morphology (H:W) between O<sub>2</sub> treatments were due to endogenous catecholamines. In normoxia, the projected surface area increased upon adrenaline treatment, but this was not observed in hypoxia-reared embryos and larvae. The projected surface area of erythrocytes from hypoxia-reared *O. mykiss* was greater at all developmental stages, but the MCV data suggest that this was not

the result of erythrocytic swelling. It is also unlikely that prolonged hypoxia would chronically elevate catecholamines and maintain erythrocytic swelling, as catecholamines return to resting levels 1.5 h after hypoxia exposure (~25% of O<sub>2</sub> saturation for 90 min) in adult rainbow trout (Van Raaij et al., 1996). Therefore, the mechanism behind the higher projected surface area in hypoxia remains unknown.

We observed a greater Bohr effect in Stage 32 and 33 hypoxia-reared larvae relative to the normoxic group. This result was unexpected given that there was no significant change in whole-blood pH (data not shown) or in *P*<sub>50</sub> in hypoxia and that Hb<sub>E</sub> displays little Bohr effect (Iuchi, 1973b). Although the whole-blood pH values were not significantly different between treatments, when *P*<sub>CO<sub>2</sub></sub> increased from 0.2 to 0.4 kPa, the change in pH was two to eight times smaller in hypoxia-reared compared with normoxia-reared larvae at Stages 33 and 32, respectively. These results imply greater blood buffering capacity in hypoxia-reared larvae, but this point will require further investigation.

### Conclusions

Overall, rainbow trout exposed to chronic low O<sub>2</sub> showed a delay in Hb and erythrocyte turnover and thus demonstrated heterokairy (Spicer and Burggren, 2003). In addition, Hb concentrations and erythrocyte counts were not maintained at normoxic levels during low O<sub>2</sub> treatments, while Hb<sub>E</sub> mRNA levels and round, immature erythrocytes were retained. Despite the presence of embryonic erythrocytes in larvae reared in hypoxia, Hb–O<sub>2</sub> affinity was similar to that of normoxic controls. We propose that Hb–O<sub>2</sub> affinity is set to optimize the balance between O<sub>2</sub> loading and unloading in fast-growing larval stages regardless of environmental O<sub>2</sub> levels, possibly through increased adenylates within the erythrocytes. We conclude that early hypoxia exposure has unique influences on the blood–O<sub>2</sub> transport system in developing trout in contrast to adults, which may be partly related to their heavier reliance on cutaneous respiration and direct O<sub>2</sub> diffusion.

### ACKNOWLEDGEMENTS

The authors thank Drs Doug Fudge, Chris Wood and Colin Brauner, as well as Andy Turko and Cayleigh Robertson, for helpful discussions; Dr Peter Frappell for assistance with the *P*<sub>wee50</sub> measurements; and Bob Frank and Matt Cornish for help with animal husbandry. A special thanks to Dr Glenn Tattersall for devoting several days to optimizing the *P*<sub>wee50</sub> instrument. We also thank three anonymous reviewers for constructive comments.

### AUTHOR CONTRIBUTIONS

K.B. and P.A.W. conceived and designed the study. K.B. carried out the experimental work and analyzed the data. K.B. and P.A.W. interpreted the results and wrote the manuscript.

### COMPETING INTERESTS

No competing interests declared.

### FUNDING

Funding for this project was provided by the Natural Sciences and Engineering Research Council of Canada Discovery Grants program to P.A.W. and K.B. was in receipt of an Ontario Graduate Scholarship.

### REFERENCES

- Aegerter, S., Jalabert, B. and Bobe, J. (2004). Messenger RNA stockpile of cyclin B, insulin-like growth factor I, insulin-like growth factor II, insulin-like growth factor receptor Ib, and p53 in the rainbow trout oocyte in relation with developmental competence. *Mol. Reprod. Dev.* **67**, 127–135.
- Allen, B. W. and Piantadosi, C. A. (2006). How do red blood cells cause hypoxic vasodilation? The SNO-hemoglobin paradigm. *Am. J. Physiol.* **291**, H1507–H1512.
- Binotti, I., Giovenco, S., Giardina, B., Antonini, E., Brunori, M. and Wyman, J. (1971). Studies on the functional properties of fish hemoglobins. II. The oxygen equilibrium of the isolated hemoglobin components from trout blood. *Arch. Biochem. Biophys.* **142**, 274–280.
- Bohr, C., Hasselbalch, K. and Krogh, A. (1904). Concerning a biologically important relationship – the influence of the carbon dioxide content of blood on its oxygen binding. *Skand. Arch. Physiol.* **16**, 402–412.
- Bossa, F., Barra, D., Coletta, M., Martini, F., Liverzani, A., Petruzzelli, R., Bonaventura, J. and Brunori, M. (1976). Primary structure of hemoglobins from trout (*Salmo irideus*). Partial determination of amino acid sequence of HB trout IV. *FEBS Lett.* **64**, 76–80.
- Boutillier, R. G., Dobson, G., Hoeger, U. and Randall, D. J. (1988). Acute exposure to graded levels of hypoxia in rainbow trout (*Salmo gairdneri*): metabolic and respiratory adaptations. *Respir. Physiol.* **71**, 69–82.
- Brauner, C. J. and Wang, T. (1997). The optimal oxygen equilibrium curve: a comparison between environmental hypoxia and anemia. *Am. Zool.* **37**, 101–108.
- Buc-Calderon, P., Lefebvre, V. and Steenbrugge, M. (1993). Inhibition of protein synthesis in isolated hepatocytes as an immediate response to oxygen limitation. In *Surviving Hypoxia* (ed. P. W. Hochachka, P. L. Lutz, T. Sick, M. Rosenthal and G. van den Thillart), pp. 271–280. Boca Raton, FL: CRC Press.
- Cameron, J. N. (1971). Oxygen dissociation characteristics of the blood of the rainbow trout, *Salmo gairdneri*. *Comp. Biochem. Physiol.* **38A**, 699–704.
- Ciuhandu, C. S., Stevens, E. D. and Wright, P. A. (2005). The effects of oxygen on the growth of *Oncorhynchus mykiss* embryos with and without a chorion. *J. Fish Biol.* **67**, 1544–1551.
- Clark, T. D., Seymour, R. S., Wells, R. M. G. and Frappell, P. B. (2008). Thermal effects on the blood respiratory properties of southern bluefin tuna, *Thunnus maccoyii*. *Comp. Biochem. Physiol.* **150A**, 239–246.
- Coble, D. W. (1961). Influence of water exchange and dissolved oxygen in redds on survival of steelhead trout embryos. *Trans. Am. Fish. Soc.* **90**, 469–474.
- Cook, D. G., Iftikar, F. I., Baker, D. W., Hickey, A. J. R. and Herbert, N. A. (2013). Low-O<sub>2</sub> acclimation shifts the hypoxia avoidance behaviour of snapper (*Pagrus auratus*) with only subtle changes in aerobic and anaerobic function. *J. Exp. Biol.* **216**, 369–378.
- Coulibaly, I., Gahr, S. A., Yao, J. and Rexroad, C. E., III (2006). Embryonic expression of UCP2 in rainbow trout (*Oncorhynchus mykiss*). *Fish Physiol. Biochem.* **32**, 249–253.
- Currie, S. and Tufts, B. L. (1993). An analysis of carbon dioxide transport in arterial and venous blood of the rainbow trout, *Oncorhynchus mykiss*, following exhaustive exercise. *Fish Physiol. Biochem.* **12**, 183–192.
- Eddy, F. B. (1971). Blood gas relationships in the rainbow trout *Salmo gairdneri*. *J. Exp. Biol.* **55**, 695–711.
- Essex-Fraser, P. A., Steele, S. L., Bernier, N. J., Murray, B. W., Stevens, E. D. and Wright, P. A. (2005). Expression of four glutamine synthetase genes in the early stages of development of rainbow trout (*Oncorhynchus mykiss*) in relationship to nitrogen excretion. *J. Biol. Chem.* **280**, 20268–20273.
- Fago, A., Forest, E. and Weber, R. E. (2001). Hemoglobin and subunit multiplicity in the rainbow trout (*Oncorhynchus mykiss*) hemoglobin system. *Fish Physiol. Biochem.* **24**, 335–342.
- Fritsche, R., Schwerte, T. and Pelster, B. (2000). Nitric oxide and vascular reactivity in developing zebrafish, *Danio rerio*. *Am. J. Physiol.* **279**, R2200–R2207.
- Gallaughier, P. and Farrell, A. P. (1998). Hematocrit and blood oxygen-carrying capacity. In *Fish Respiration: Fish Physiology*, Vol. 17 (ed. S. F. Perry and B. Tufts), pp. 185–227. San Diego, CA: Academic Press.
- Garside, E. T. (1966). Effects of oxygen in relation to temperature on the development of embryos of brook trout and rainbow trout. *J. Fish. Res. Board Can.* **23**, 1121–1134.
- Hamor, T. J. and Garside, E. T. (1976). Developmental rates of embryos of Atlantic salmon, *Salmo salar* L., in response to various levels of temperature, dissolved oxygen, and water exchange. *Can. J. Zool.* **54**, 1912–1917.
- Hassoun, E., Kariya, C. and Williams, F. E. (2005). Dichloroacetate-induced developmental toxicity and production of reactive oxygen species in zebrafish embryos. *J. Biochem. Mol. Toxicol.* **19**, 52–58.
- Hochachka, P. W., Buck, L. T., Doll, C. J. and Land, S. C. (1996). Unifying theory of hypoxia tolerance: molecular/metabolic defense and rescue mechanisms for surviving oxygen lack. *Proc. Natl. Acad. Sci. USA* **93**, 9493–9498.
- Holeton, G. F. (1971). Respiratory and circulatory responses of rainbow trout larvae to carbon monoxide and to hypoxia. *J. Exp. Biol.* **55**, 683–694.
- Hoxter, G. (1979). Suggested isobestic wavelength calibration in clinical analyses. *Clin. Chem.* **25**, 143–146.
- Irving, L., Black, E. C. and Safford, V. (1941). The influence of temperature upon the combination of oxygen with the blood of trout. *Biol. Bull.* **80**, 1–17.
- Iuchi, I. (1973a). The post-hatching transition of erythrocytes from larval to adult type in the rainbow trout, *Salmo gairdnerii irideus*. *J. Exp. Zool.* **184**, 383–395.
- Iuchi, I. (1973b). Chemical and physiological properties of the larval and the adult hemoglobins in rainbow trout, *Salmo gairdnerii irideus*. *Comp. Biochem. Physiol.* **44B**, 1087–1101.
- Iuchi, I. (1985). Cellular and molecular bases of the larval-adult shift of hemoglobins in fish. *Zool. Sci.* **2**, 11–23.
- Iuchi, I. and Yamagami, K. (1969). Electrophoretic pattern of larval haemoglobins of the salmonid fish, *Salmo gairdnerii irideus*. *Comp. Biochem. Physiol.* **28**, 977–979.
- Iuchi, I. and Yamamoto, M. (1983). Erythropoiesis in the developing rainbow trout, *Salmo gairdnerii irideus*: histochemical and immunochemical detection of erythropoietic organs. *J. Exp. Zool.* **226**, 409–417.
- Jensen, F. B. (2004). Red blood cell pH, the Bohr effect, and other oxygenation-linked phenomena in blood O<sub>2</sub> and CO<sub>2</sub> transport. *Acta Physiol. Scand.* **182**, 215–227.
- Jensen, F. B., Fago, A. and Weber, R. E. (1998). Hemoglobin structure and function. In *Fish Respiration: Fish Physiology*, Vol. 17 (ed. S. F. Perry and B. Tufts), pp. 185–227. San Diego, CA: Academic Press.
- Johansson-Sjöbeck, M.-L. and Larsson, A. (1979). Effects of inorganic lead on delta-aminolevulinic acid dehydratase activity and hematological variables in the rainbow trout, *Salmo gairdnerii*. *Arch. Environ. Contam. Toxicol.* **8**, 419–431.

- Lai, J. C. C., Kakuta, I., Mok, H. O., Rummer, J. L. and Randall, D. (2006). Effects of moderate and substantial hypoxia on erythropoietin levels in rainbow trout kidney and spleen. *J. Exp. Biol.* **209**, 2734-2738.
- Land, S. C. and Hochachka, P. W. (1994). Protein turnover during metabolic arrest in turtle hepatocytes: role and energy dependence of proteolysis. *Am. J. Physiol.* **266**, C1028-C1036.
- Land, S. C., Buck, L. T. and Hochachka, P. W. (1993). Response of protein synthesis to anoxia and recovery in anoxia-tolerant hepatocytes. *Am. J. Physiol.* **265**, R41-R48.
- Maruyama, K., Yasumasu, S. and Iuchi, I. (1999). Characterization and expression of embryonic globin in the rainbow trout, *Oncorhynchus mykiss*: intra-embryonic initiation of erythropoiesis. *Dev. Growth Differ.* **41**, 589-599.
- Massabuau, J. C. (2001). From low arterial- to low tissue-oxygenation strategy. An evolutionary theory. *Respir. Physiol.* **128**, 249-261.
- McDonald, D. G. and McMahon, B. R. (1977). Respiratory development in Arctic char *Salvelinus alpinus* under conditions of normoxia and chronic hypoxia. *Can. J. Zool.* **55**, 1461-1467.
- Miller, S. C., Reeb, S. E., Wright, P. A. and Gillis, T. E. (2008). The oxygen concentration in the water boundary layer next to rainbow trout (*Oncorhynchus mykiss*) embryos is influenced by hypoxia exposure, time, metabolic rate, and water flow. *Can. J. Fish. Aquat. Sci.* **65**, 2170-2177.
- Miller, S. C., Gillis, T. E. and Wright, P. A. (2011). The ontogeny of regulatory control of the rainbow trout (*Oncorhynchus mykiss*) heart and how this is influenced by chronic hypoxia exposure. *J. Exp. Biol.* **214**, 2065-2072.
- Nestel, P. and Taylor, H. (1997). Common anemia detection tests. In *Anemia Detection Methods in Low-resource Settings: A Manual for Health Workers* (ed. P. Nestel), pp. 25, 38-41. Seattle, WA: Program for Appropriate Technology in Health.
- Nickerson, J. G., Dugan, S. G., Drouin, G., Perry, S. F. and Moon, T. M. (2003). Activity of the unique  $\beta$ -adrenergic Na<sup>+</sup>/H<sup>+</sup> exchanger in trout erythrocytes is controlled by a novel  $\beta_3$ -AR subtype. *Am. J. Physiol.* **285**, R562-R535.
- Nikinmaa, M. (1983). Adrenergic regulation of haemoglobin oxygen affinity in rainbow trout red cells. *J. Comp. Physiol.* **152**, 67-72.
- Nikinmaa, M. and Huestis, W. H. (1984). Adrenergic swelling of nucleated erythrocytes: cellular mechanisms in a bird, domestic goose, and two teleosts, striped bass and rainbow trout. *J. Exp. Biol.* **113**, 215-224.
- Nikinmaa, M. and Soivio, A. (1979). Oxygen dissociation curves and oxygen capacities of blood of a freshwater fish, *Salmo gairdneri*. *Ann. Zool. Fennici* **16**, 217-221.
- Ordway, G. A. and Garry, D. J. (2004). Myoglobin: an essential hemoprotein in striated muscle. *J. Exp. Biol.* **207**, 3441-3446.
- Patrick, M. L., Pärt, P., Marshall, W. S. and Wood, C. M. (1997). Characterization of ion and acid-base transport in the fresh water adapted mummichog (*Fundulus heteroclitus*). *J. Exp. Biol.* **279**, 208-219.
- Pelster, B. and Burggren, W. W. (1996). Disruption of hemoglobin oxygen transport does not impact oxygen-dependent physiological processes in developing embryos of zebra fish (*Danio rerio*). *Circ. Res.* **79**, 358-362.
- Pelster, B., Gittenberger-de Groot, A. C., Poelmann, R. E., Rombough, P., Schwerte, T. and Thompson, M. B. (2010). Functional plasticity of the developing cardiovascular system: examples from different vertebrates. *Physiol. Biochem. Zool.* **83**, 775-791.
- Peterson, N. P. and Quinn, T. P. (1996). Spatial and temporal variation in dissolved oxygen in natural egg pockets of chum salmon, in Kennedy Creek, Washington. *J. Fish Biol.* **48**, 131-143.
- Rand, P. W., Lacombe, E., Hunt, H. E. and Austin, W. H. (1964). Viscosity of normal human blood under normothermic and hypothermic conditions. *J. Appl. Physiol.* **19**, 117-122.
- Řehulka, J. and Adamec, V. (2004). Red blood cell indices for rainbow trout (*Oncorhynchus mykiss* Walbaum) reared in cage and raceway culture. *Acta Vet.* **73**, 105-114.
- Roesner, A., Hankeln, T. and Burmester, T. (2006). Hypoxia induces a complex response of globin expression in zebrafish (*Danio rerio*). *J. Exp. Biol.* **209**, 2129-2137.
- Rombough, P. J. (1988). Respiratory gas exchange, aerobic metabolism, and effects of hypoxia during early life. In *Fish Physiology*, Vol. 11 (ed. W. S. Hoar and D. J. Randall), pp. 59-161. London: Academic Press.
- Rombough, P. J. and Drader, H. (2009). Hemoglobin enhances oxygen uptake in larval zebrafish (*Danio rerio*) but only under conditions of extreme hypoxia. *J. Exp. Biol.* **212**, 778-784.
- Rombough, P. J. and Ure, D. (1991). Partitioning of oxygen uptake between cutaneous and branchial surfaces in larval and young juvenile chinook salmon *Oncorhynchus tshawytscha*. *Physiol. Zool.* **64**, 717-727.
- Ronald, A. P. and Tsuyuki, H. (1971). The subunit structures and the molecular basis of the multiple hemoglobins of two species of trout, *Salmo gairdneri* and *S. clarki clarki*. *Comp. Biochem. Physiol.* **39B**, 195-202.
- Sarma, P. R. (1990). Red cell indices. In *Clinical Methods: The History, Physical, and Laboratory Examinations*, 3rd edn (ed. H. K. Walker, W. D. Hall and J. W. Hurst), pp. 720-723. Boston, MA: Butterworths.
- Shumway, D. L., Warren, C. E. and Doudroff, P. (1964). Influence of oxygen concentration and water movement on the growth of steelhead trout and coho salmon embryos. *Trans. Am. Fish. Soc.* **93**, 342-356.
- Soitamo, A. J., Rabergh, C. M., Gassmann, M., Sistonon, L. and Nikinmaa, M. (2001). Characterization of a hypoxia-inducible factor (HIF-1 $\alpha$ ) from rainbow trout. Accumulation of protein occurs at normal venous oxygen tension. *J. Biol. Chem.* **276**, 19699-19705.
- Soivio, A., Nikinmaa, M. and Westman, K. (1980). The blood oxygen binding properties of hypoxic *Salmo gairdneri*. *J. Comp. Physiol.* **136**, 83-87.
- Spicer, J. I. and Burggren, W. W. (2003). Development of physiological regulatory systems: altering the timing of crucial events. *Zoology* **106**, 91-99.
- Stevens, E. D. and Randall, D. J. (1967). Changes of gas concentrations in blood and water during moderate swimming activity in rainbow trout. *J. Exp. Biol.* **46**, 329-337.
- Strober, W. (1997). Monitoring cell growth. *Curr. Protoc. Immunol.* **21**, A.3A.1-A.3A.2.
- Ton, C., Stamatiou, D. and Liew, C.-C. (2003). Gene expression profile of zebrafish exposed to hypoxia during development. *Physiol. Genomics* **13**, 97-106.
- Tufts, B. L. and Randall, D. J. (1989). The functional significance of adrenergic pH regulation in fish erythrocytes. *Can. J. Zool.* **67**, 235-238.
- Van Raaij, M. T. M., Van den Thillart, G. E. E. J. M., Vianen, G. J., Pit, D. S. S., Balm, P. H. M. and Steffens, A. B. (1996). Substrate mobilization and hormonal changes in rainbow trout (*Oncorhynchus mykiss*, L.) and common carp (*Cyprinus carpio*, L.) during deep hypoxia and subsequent recovery. *J. Comp. Physiol. B* **166**, 443-452.
- Vernier, J.-M. (1969). Table chronologique du developpement embryonnaire de la truite arc-en-ciel, *Salmo gairdneri* Rich. 1836. *Ann. Embryol. Morphogen.* **2**, 495-520.
- Vorger, P. (1985). The Bohr effect of the blood in rainbow trout (*Salmo gairdneri*). A comparative study with human blood, using precise oxygen equilibrium curves and the Adair model. *Comp. Biochem. Physiol.* **82A**, 915-924.
- Vuori, K. A. M., Soitamo, A., Vuorinen, P. J. and Nikinmaa, M. (2004). Baltic salmon (*Salmo salar*) yolk-sac fry mortality is associated with disturbances in the function of hypoxia-inducible transcription factor (HIF-1 $\alpha$ ) and consecutive gene expression. *Aquat. Toxicol.* **68**, 301-313.
- Vuori, K. A., Paavilainen, T., Nikinmaa, M., Czesny, S. and Rinhard, J. (2009). Molecular markers of yolk sac fry development in nine families of lake trout. *J. Aquat. Anim. Health* **21**, 279-289.
- Wang, T. and Malte, H. (2011). O<sub>2</sub> uptake and transport: the optimal P<sub>50</sub>. In *Encyclopedia of Fish Physiology* (ed. A. P. Farrell), pp. 893-898. San Diego, CA: Academic Press.
- Weber, R. E., Wood, S. C. and Lomholt, J. P. (1976). Temperature acclimation and oxygen-binding properties of blood and multiple haemoglobins of rainbow trout. *J. Exp. Biol.* **65**, 333-345.
- Wells, P. R. and Pinder, A. W. (1996). The respiratory development of Atlantic salmon. II. Partitioning of oxygen uptake among gills, yolk sac and body surfaces. *J. Exp. Biol.* **199**, 2737-2744.
- Wells, R. M. G. and Weber, R. E. (1991). Is there an optimal haematocrit for rainbow trout, *Oncorhynchus mykiss* (Walbaum)? An interpretation of recent data based on blood viscosity measurements. *J. Fish Biol.* **38**, 53-65.
- Williford, D. C. and Hill, E. P. (1986). Modest effect of temperature on the porcine oxygen dissociation curve. *Respir. Physiol.* **64**, 113-123.
- Wittenberg, J. B. and Wittenberg, B. A. (2007). Myoglobin-enhanced oxygen delivery to isolated cardiac mitochondria. *J. Exp. Biol.* **210**, 2082-2090.
- Wolf, K. (1963). Physiological salines for fresh-water teleosts. *Prog. Fish-Cult.* **25**, 135-140.
- Wood, W. G. (1988). Hemoglobin switching. *Physiology* **3**, 33-35.
- Wood, C. M., Bucking, C. and Grosell, M. (2010). Acid-base responses to feeding and intestinal Cl<sup>-</sup> uptake in freshwater- and seawater-acclimated killifish, *Fundulus heteroclitus*, an agastric euryhaline teleost. *J. Exp. Biol.* **213**, 2681-2692.
- Yamamoto, M. and Iuchi, I. (1975). Electron microscopic study of erythrocytes in developing rainbow trout, *Salmo gairdneri irideus*, with particular reference to changes in the cell line. *J. Exp. Zool.* **191**, 407-426.
- Youngson, A. F., Malcolm, I. A., Thorley, J. L., Bacon, P. J. and Soulsby, C. (2004). Long-residence groundwater effects on incubating salmonid eggs: low hyporheic oxygen impairs embryo development. *Can. J. Fish. Aquat. Sci.* **61**, 2278-2287.
